# Supplementary material for: Autistic traits in myotonic dystrophy type 1 due to MBNL inhibition and RNA mis-splicing
Source: Research Square preprint supplement (doi:10.21203/rs.3.rs-3221704/v1), 2023-08-14
Supplement: Supplementary file 1 [file 0628d51e87c18ff7730a0b16.pdf]

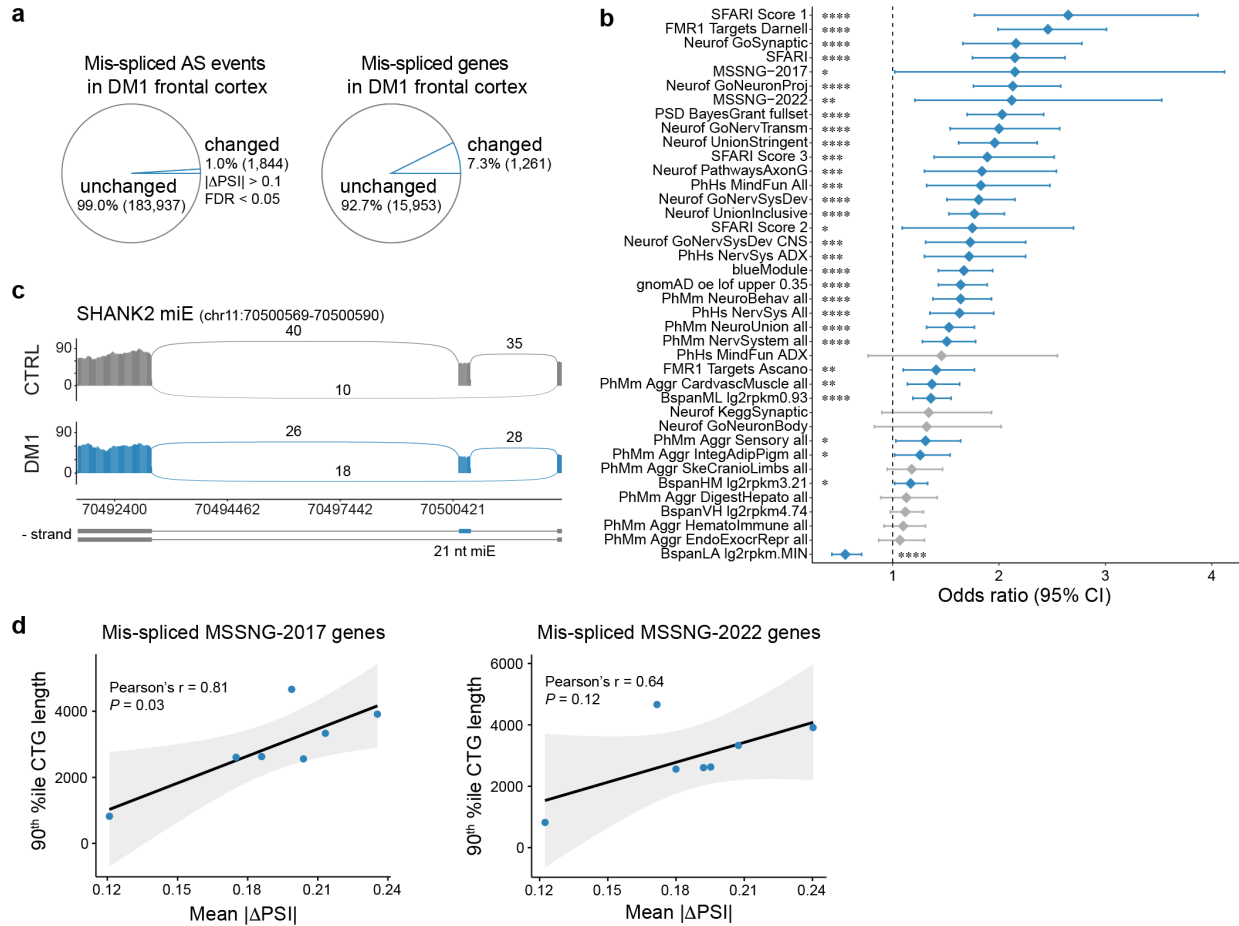

**Supplementary Fig. 1 | Mis-splicing in DM1 prefrontal cortex.** **a**, Differential AS analysis in DM1 (N = 21: N<sub>XX</sub> = 12, N<sub>XY</sub> = 9; sampling age: median = 56 years (y), min = 39y, max = 77y; unknown ASD status) compared to age-matched control (CTRL; N = 8: N<sub>XX</sub> = 4, N<sub>XY</sub> = 4; sampling age: median = 63y, min = 48y, max = 71y) prefrontal cortex (Brodmann area 10; BA10) RNA-seq samples. Pie charts represent the percentage of mis-spliced AS events (left) and genes (right) in the DM1 BA10. **b**, ASD-risk gene-set enrichment analysis for mis-spliced genes in DM1 BA10. Points represent the OR and error bars represent the 95% CI. The vertical dashed line represents OR = 1. \* FDR < 0.05, \*\* FDR < 0.01, \*\*\* FDR < 0.001, and \*\*\*\* FDR < 0.0001. **c**, Sashimi plots of DM1 (N = 8) and CTRL (N = 8) BA10 RNA-seq samples for SHANK2 miE. **d**, Correlation between estimated 90<sup>th</sup> percentile of CTG repeat lengths (N = 7)<sup>38</sup> and mean  $|\Delta\text{PSI}|$  values for mis-spliced MSSNG-2017 and MSSNG-2022 genes in DM1 BA10.

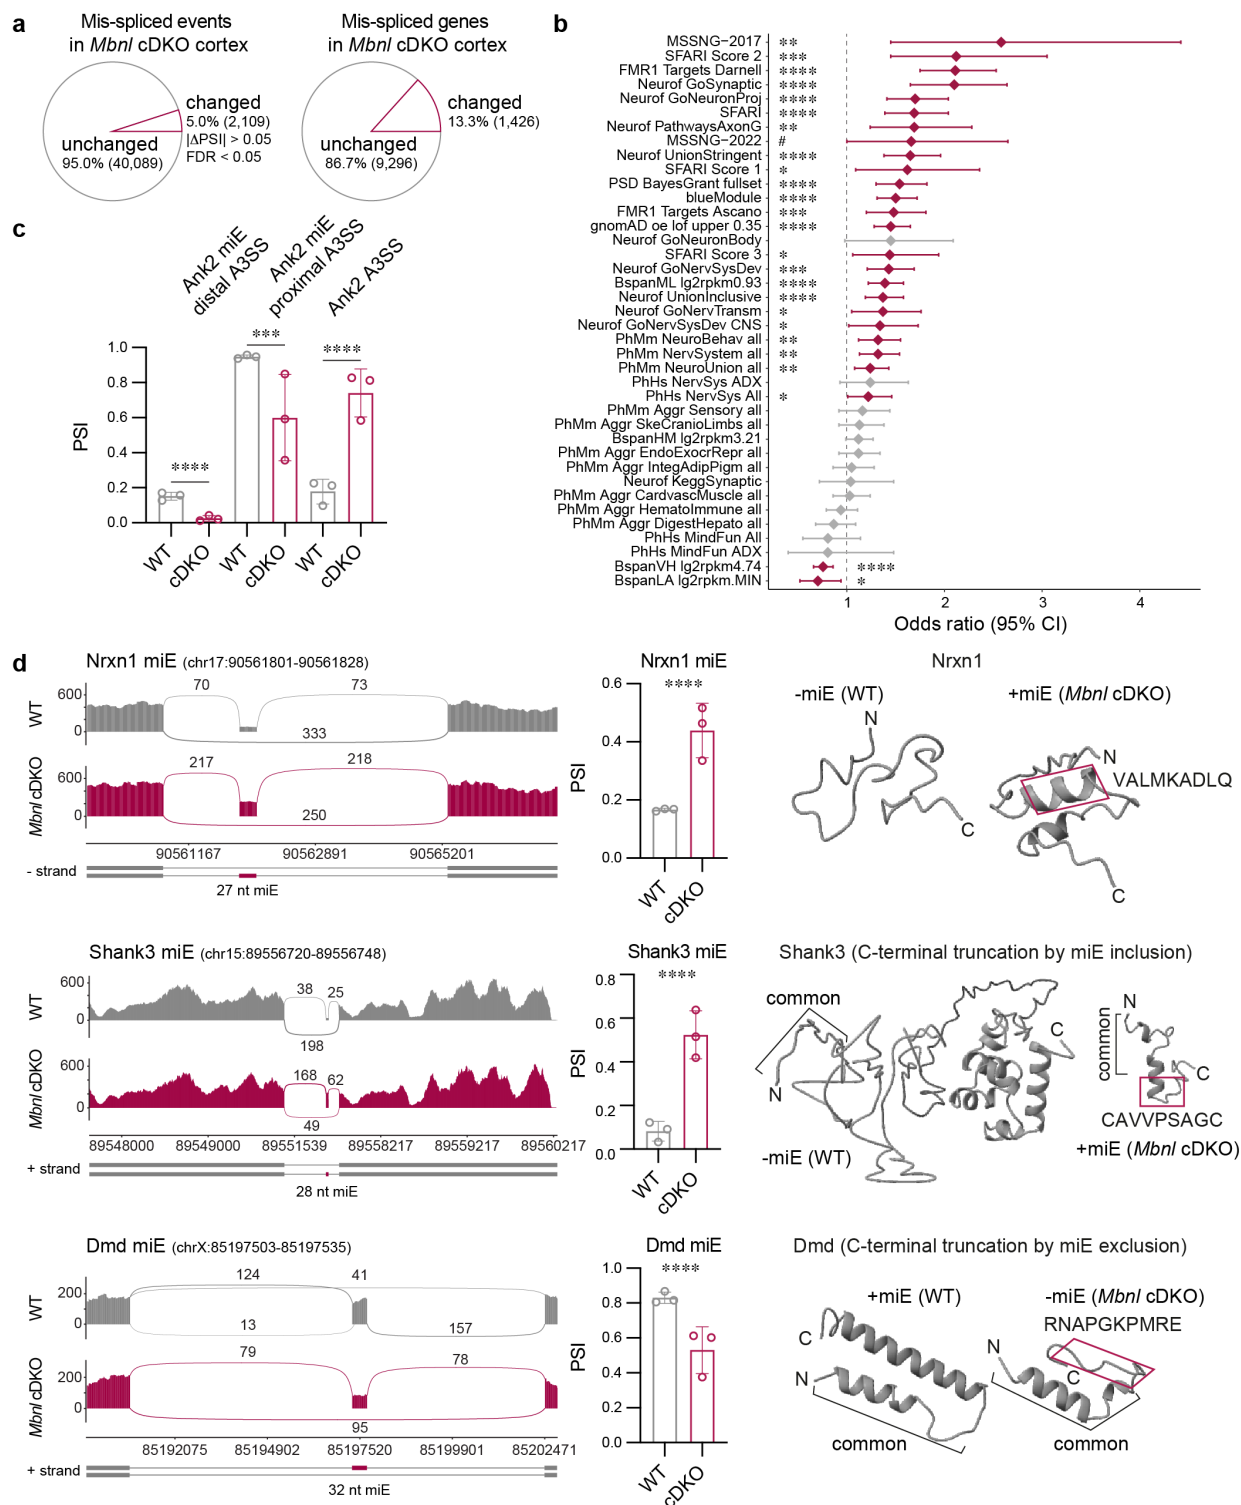

**Supplementary Fig. 2 | MiE mis-splicing in *Mbnl* cDKO frontal cortex.** a, Differential AS analysis in *Mbnl* cDKO ( $N_{XY} = 3$ ) compared to littermate WT control ( $N_{XY} = 3$ ) frontal cortex RNA-seq samples. Pie charts represent the percentage of mis-spliced and AS events (left) and genes

(right) in the *Mbnl* cDKO frontal cortex. **b**, ASD-risk gene-set enrichment analysis for mis-spliced genes in *Mbnl* cDKO frontal cortex. Points represent the OR and error bars represent the 95% CI. The vertical dashed line represents OR = 1. **c**, The quantification of coordinate Ank2 miE and A3SS mis-splicing. The bar graphs show the mean PSI  $\pm$  SD. **d**, Examples of miE mis-splicing in ASD-risk genes. Sashimi plots of *Mbnl* cDKO and WT RNA-seq samples for *Nrxn1* miE, *Shank3* miE, and *Dmd* miE. The bar graphs show the mean PSI  $\pm$  SD. Modeled structures of mouse protein isoform regions containing a sequence encoded by miE (magenta box). **b,c,d**, # FDR = 0.056, \* FDR < 0.05, \*\* FDR < 0.01, \*\*\* FDR < 0.001, \*\*\*\* FDR < 0.0001.

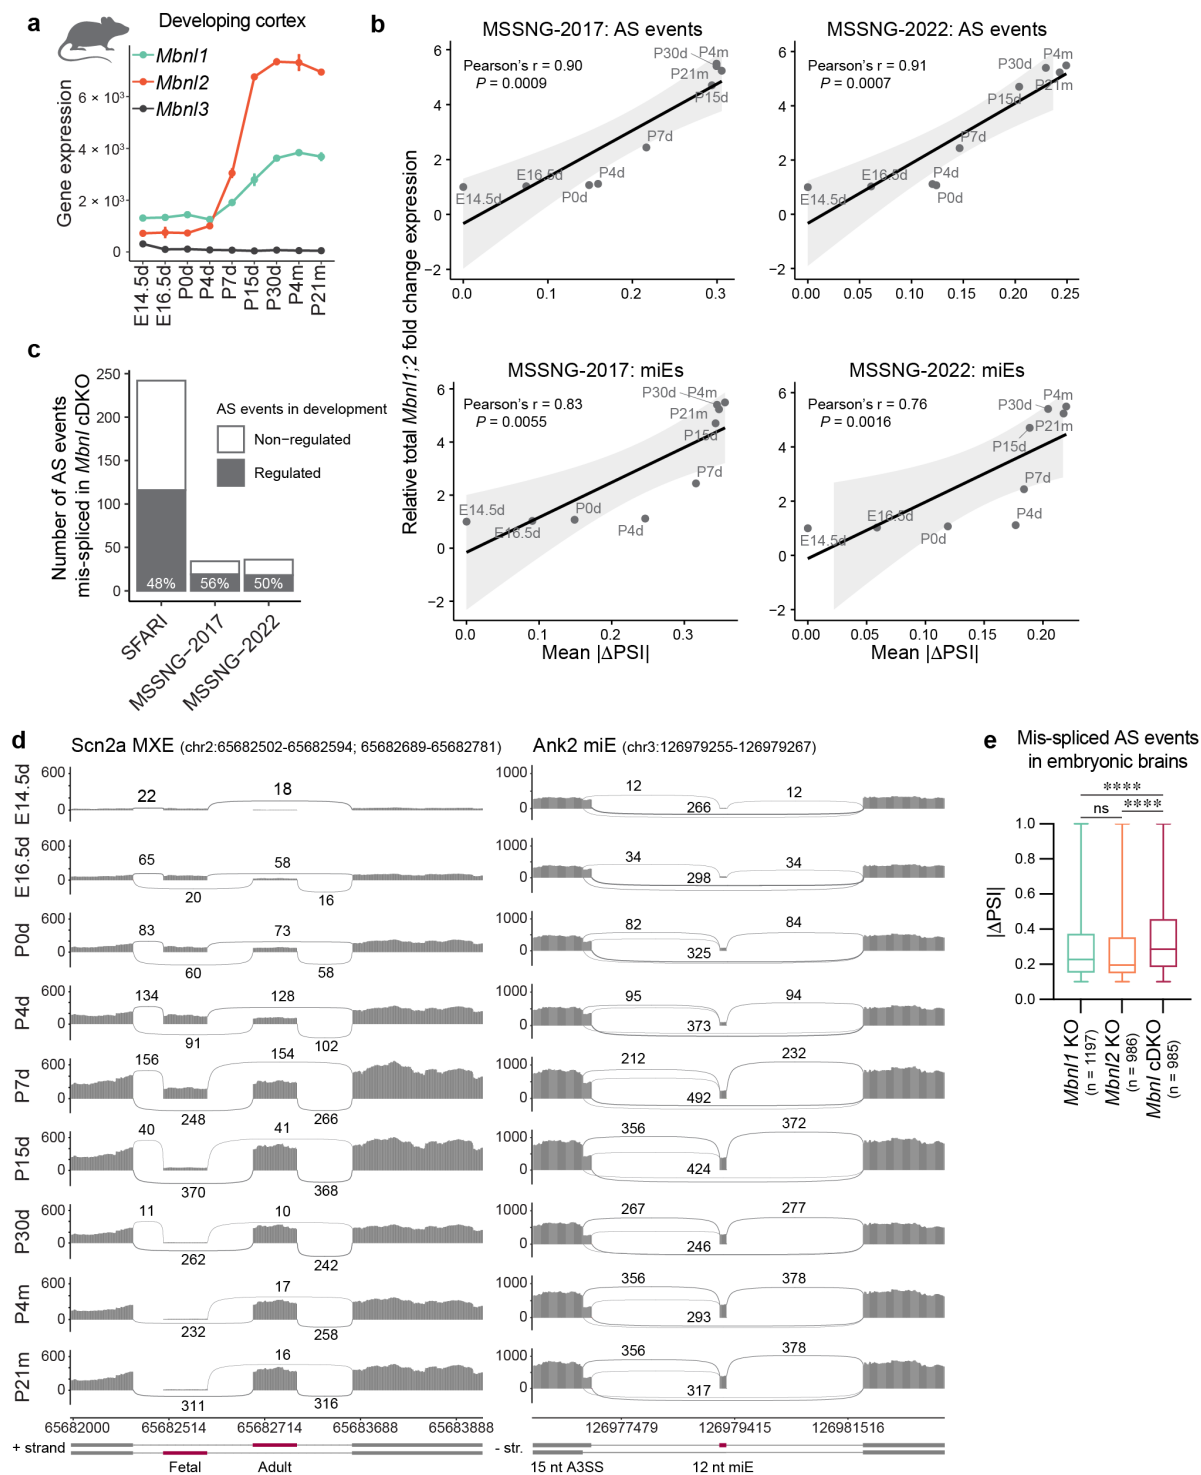

**Supplementary Fig. 3 | MBNL-mediated splicing transitions in ASD-risk genes during brain development.** **a**, *Mbnl1*, *Mbnl2* and *Mbnl3* gene expression levels during mouse cortex development. Points connected by lines show mean expression  $\pm$  SD. **b**, Correlations between

*Mbnl* gene expression and mean  $|\Delta\text{PSI}|$  values for MBNL-sensitive splicing changes in MSSNG-2017 and MSSNG-2022 genes in developing WT mouse cortex. MBNL-sensitive AS events (top) and miEs only (bottom) were selected based on differential AS analysis in the *Mbnl* cDKO cortex. The Pearson correlation coefficient ( $r$ ) and  $P$  values are shown. **c**, Bar graph shows the proportion of MBNL-sensitive AS events differentially spliced (gray) in the developing cortex (E14.5d, E16.5d vs P4m, P21m). **d**, Sashimi plots show *Scn2a* MXE and *Ank2* miE splicing transitions during WT cortical development. RNA-seq was performed ( $n = 2$  for each time point) at embryonic days: E14.5d, E16.5d, postnatal days: P0d, P4d, P7d, P15d, P30d, and postnatal months: P4m, P21m. **e**, RNA mis-splicing in *Mbnl1* KO ( $N = 2$ ), *Mbnl2* KO ( $N = 2$ ) and *Mbnl* cDKO ( $N = 2$ ) mouse E18.5 cortical neuron RNA-seq samples. The box plot shows the lower (25<sup>th</sup> %ile), middle (median, 50<sup>th</sup> %ile) and upper (75<sup>th</sup> %ile) quartiles. Whiskers show minimum and maximum. Number of mis-spliced AS events are provided as  $n$  value. Statistical differences were determined by Kruskal-Wallis test followed by Dunn's multiple comparison test: ns  $P = 0.11$ , and \*\*\*\*  $P < 0.0001$ .

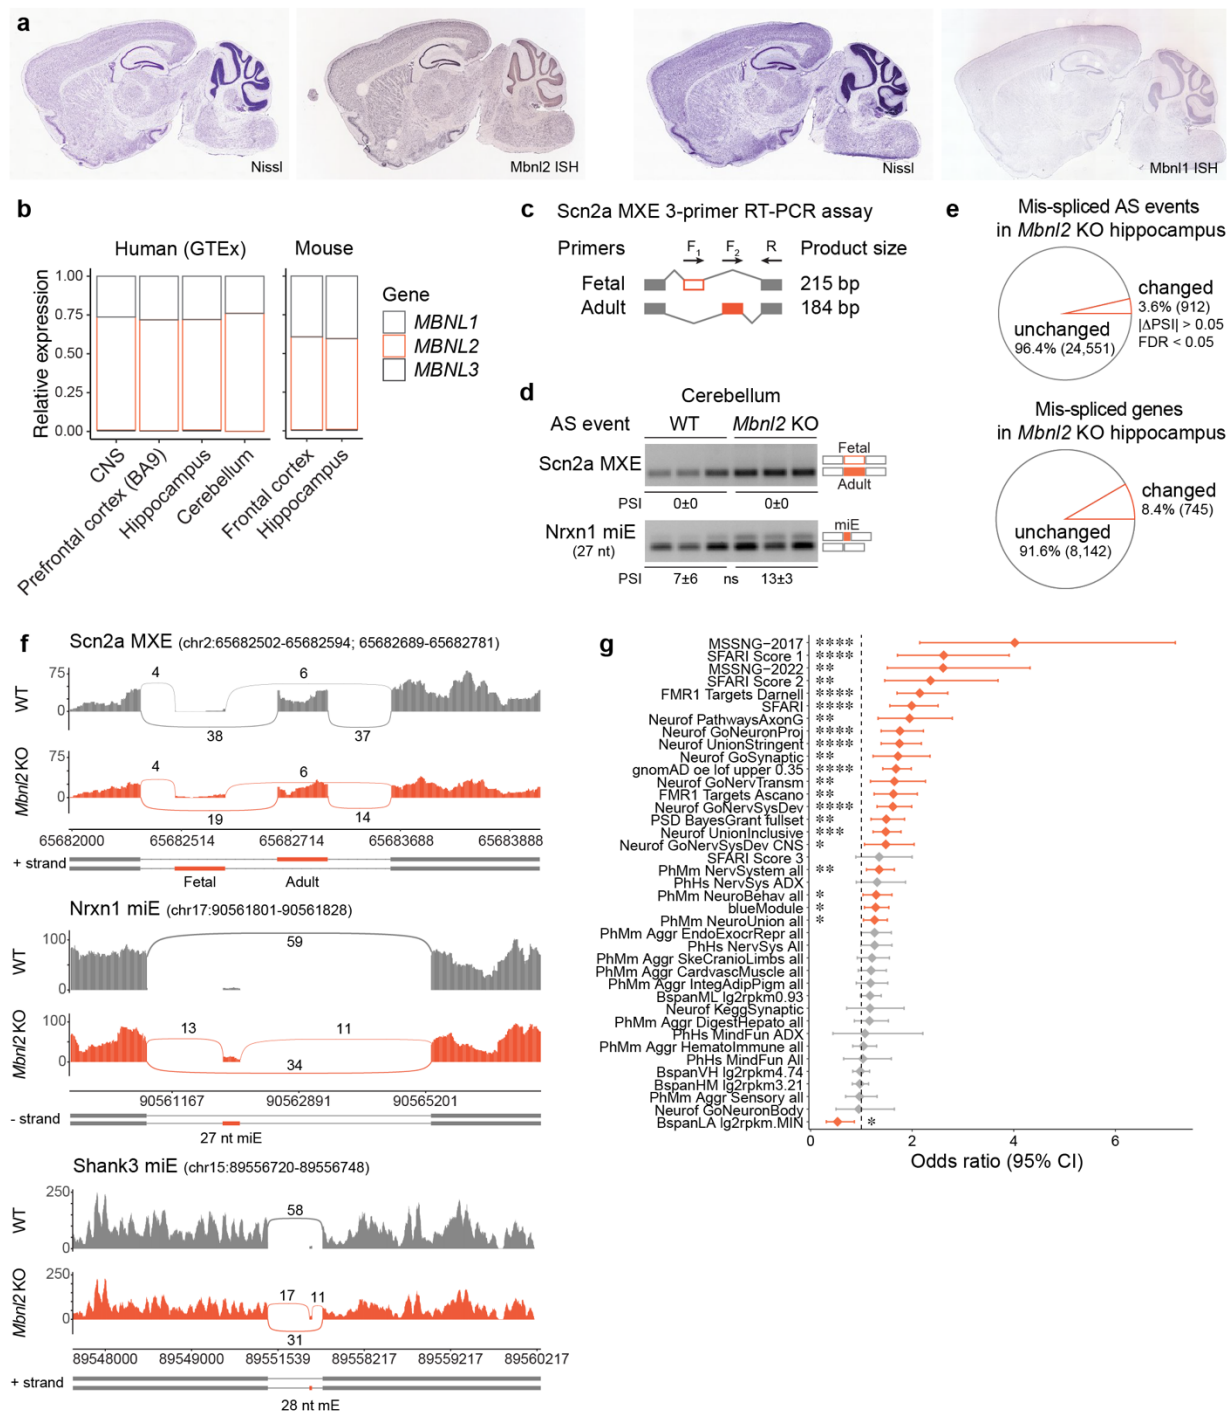

**Supplementary Fig. 4 | Mis-splicing in the mouse *Mbnl2* knockout brain.** a, Nissl from the Allen Mouse Brain Atlas at the same slice position as Mbnl1 and Mbnl2 RNA *in situ* hybridization (ISH) results. Nissl staining labels Nissl bodies and serves as a reference for the ISH data. For ISH-specific digoxigenin (DIG) tagged RNA probes were used to label cells expressing Mbnl1

([mouse.brain-map.org/gene/show/36037](http://mouse.brain-map.org/gene/show/36037)) and *Mbnl2* ([mouse.brain-map.org/gene/show/69724](http://mouse.brain-map.org/gene/show/69724)) transcripts<sup>75</sup>. **b**, Relative *MBNL1*, *MBNL2* and *MBNL3* expression in multiple human and mouse brain regions. CNS - central nervous system. **c**, Schematic of the 3-primer *Scn2a* RT-PCR assay. **d**, Representative RT-PCR assay gels of *Scn2a* MXE and *Nrxn1* miE in *Mbnl2* KO (N = 5) and littermate WT (N = 3) cerebellum samples. Mean PSI  $\pm$  SD are shown below the gels. The lack of significant differences was determined by an unpaired two-tailed t-test: ns  $P \geq 0.05$ . **e**, Differential AS analysis in *Mbnl2* KO ( $N_{xx} = 3$ ) compared to littermate WT control ( $N_{xx} = 3$ ) hippocampus RNA-seq samples. The bar graph shows the number and percentage of significantly mis-spliced AS event types ( $|\Delta\text{PSI}| > 0.1$ , FDR < 0.05). Pie charts represent the percentage of mis-spliced and AS events (left) and genes (right) in the *Mbnl2* KO. **f**, Sashimi plots of *Mbnl2* KO and WT hippocampus RNA-seq samples for *Scn2a* MXE, *Nrxn1* miE, *Shank3* miE. **g**, ASD-risk gene-set enrichment analysis for mis-spliced genes in *Mbnl2* KO hippocampus. Points represent the OR and error bars represent the 95% CI. The vertical dashed line represents OR = 1. \* FDR < 0.05, \*\* FDR < 0.01, \*\*\* FDR < 0.001, \*\*\*\* FDR < 0.0001.

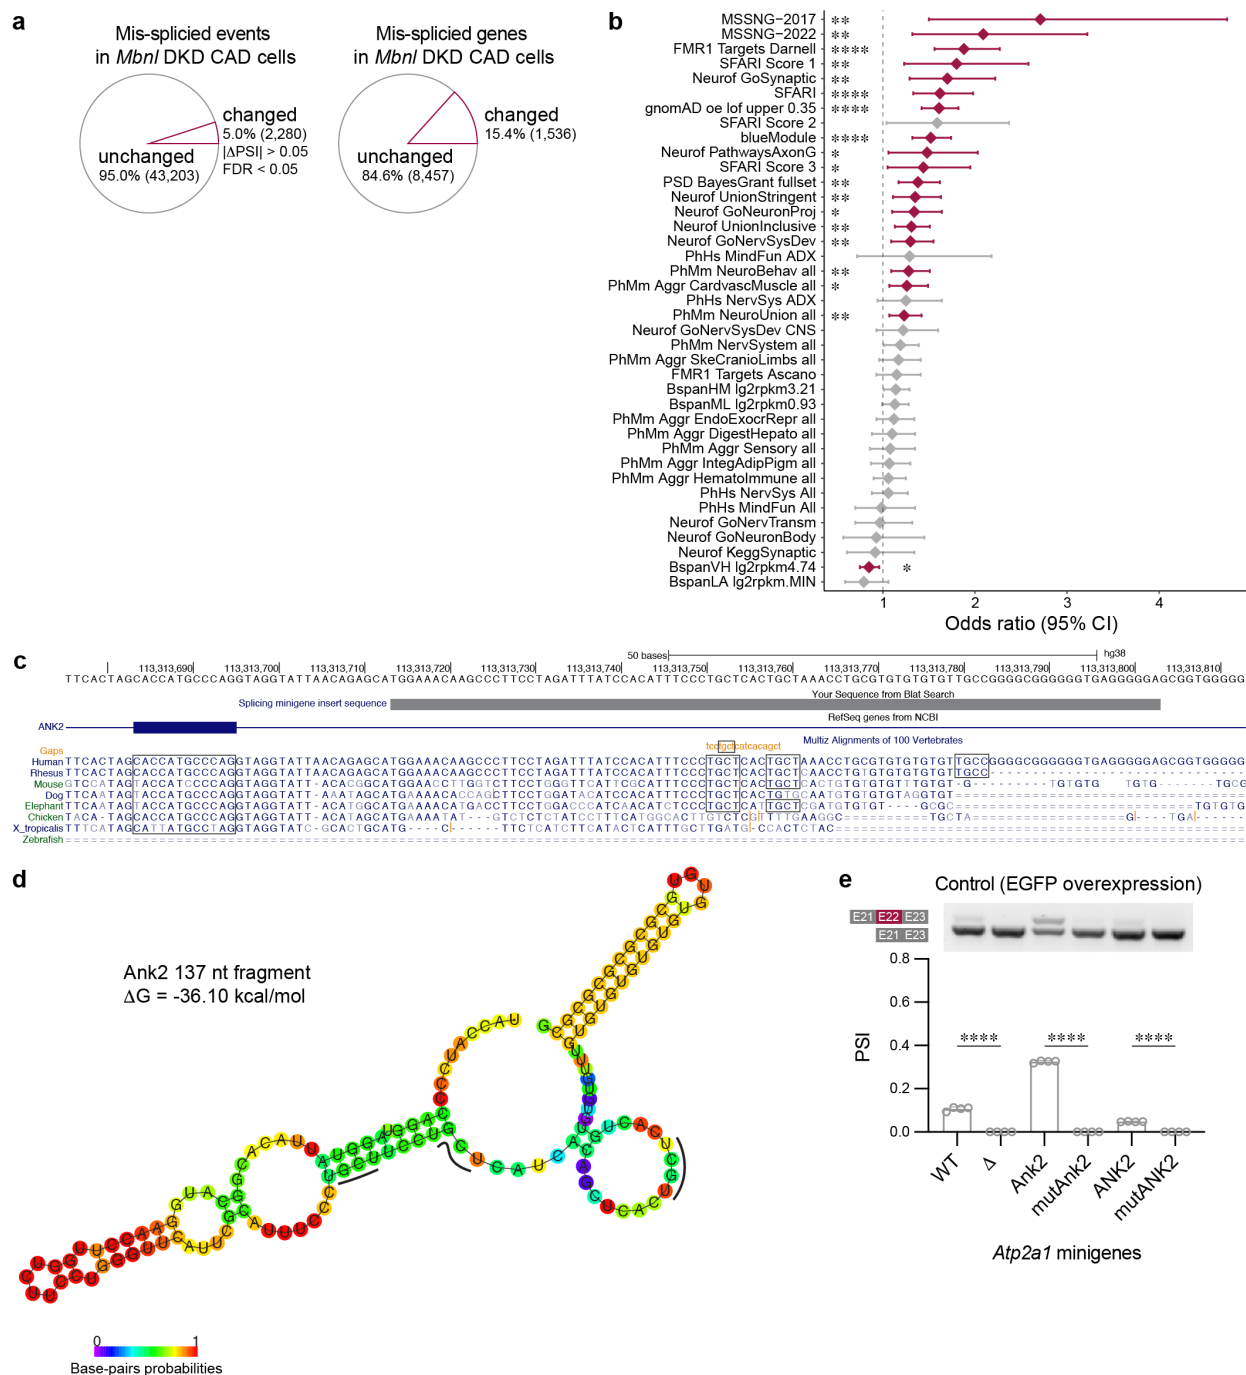Supplementary Fig. 5 | Mis-splicing in the *Mbnl1;2* double knockdown CAD cells.

**a**, Differential AS analysis in *Mbnl* DKD (N = 3) compared to control (N = 3) CAD RNA-seq samples. Pie charts represent the percentage of mis-spliced and AS events (left) and genes (right) in the *Mbnl* DKD CAD cells. **b**, ASD-risk gene-set enrichment analysis for mis-spliced genes in



*Mbnl* DKD cells. Points represent the OR and error bars represent the 95% CI. The vertical dashed line represents OR = 1. \* FDR < 0.05, \*\* FDR < 0.01, \*\*\*\* FDR < 0.0001. **c**, UCSC Genome browser view of human *ANK2* illustrates the conservation of miE 12 bp and predicted intronic MBNL-binding motifs across multiple species. **d**, The proposed centroid secondary structure for the 137 nt fragment of *Ank2*. It contains miE and downstream intron with indicated (black line) three potential MBNL-binding motifs and a (TG)<sub>n</sub>(CG)<sub>n</sub> tandem repeat sequences. The optimal thermodynamic stability of the structure is expressed in Gibbs free energy ( $\Delta G$ ) in kcal/mol for the reaction at 37°C using RNAfold. The color annotation represents the pair probabilities of the nucleotides while for unpaired regions, the color denotes the probability of being unpaired. **e**, *Atp2a1*-derived minigenes splicing profiles in HeLa cells transfected with EGFP expressing vector (N = 4). The bar graph shows the mean *Atp2a1* E22 PSI  $\pm$  SD. Significant differences were determined by unpaired t-test: \*\*\*\*  $P < 0.0001$ .

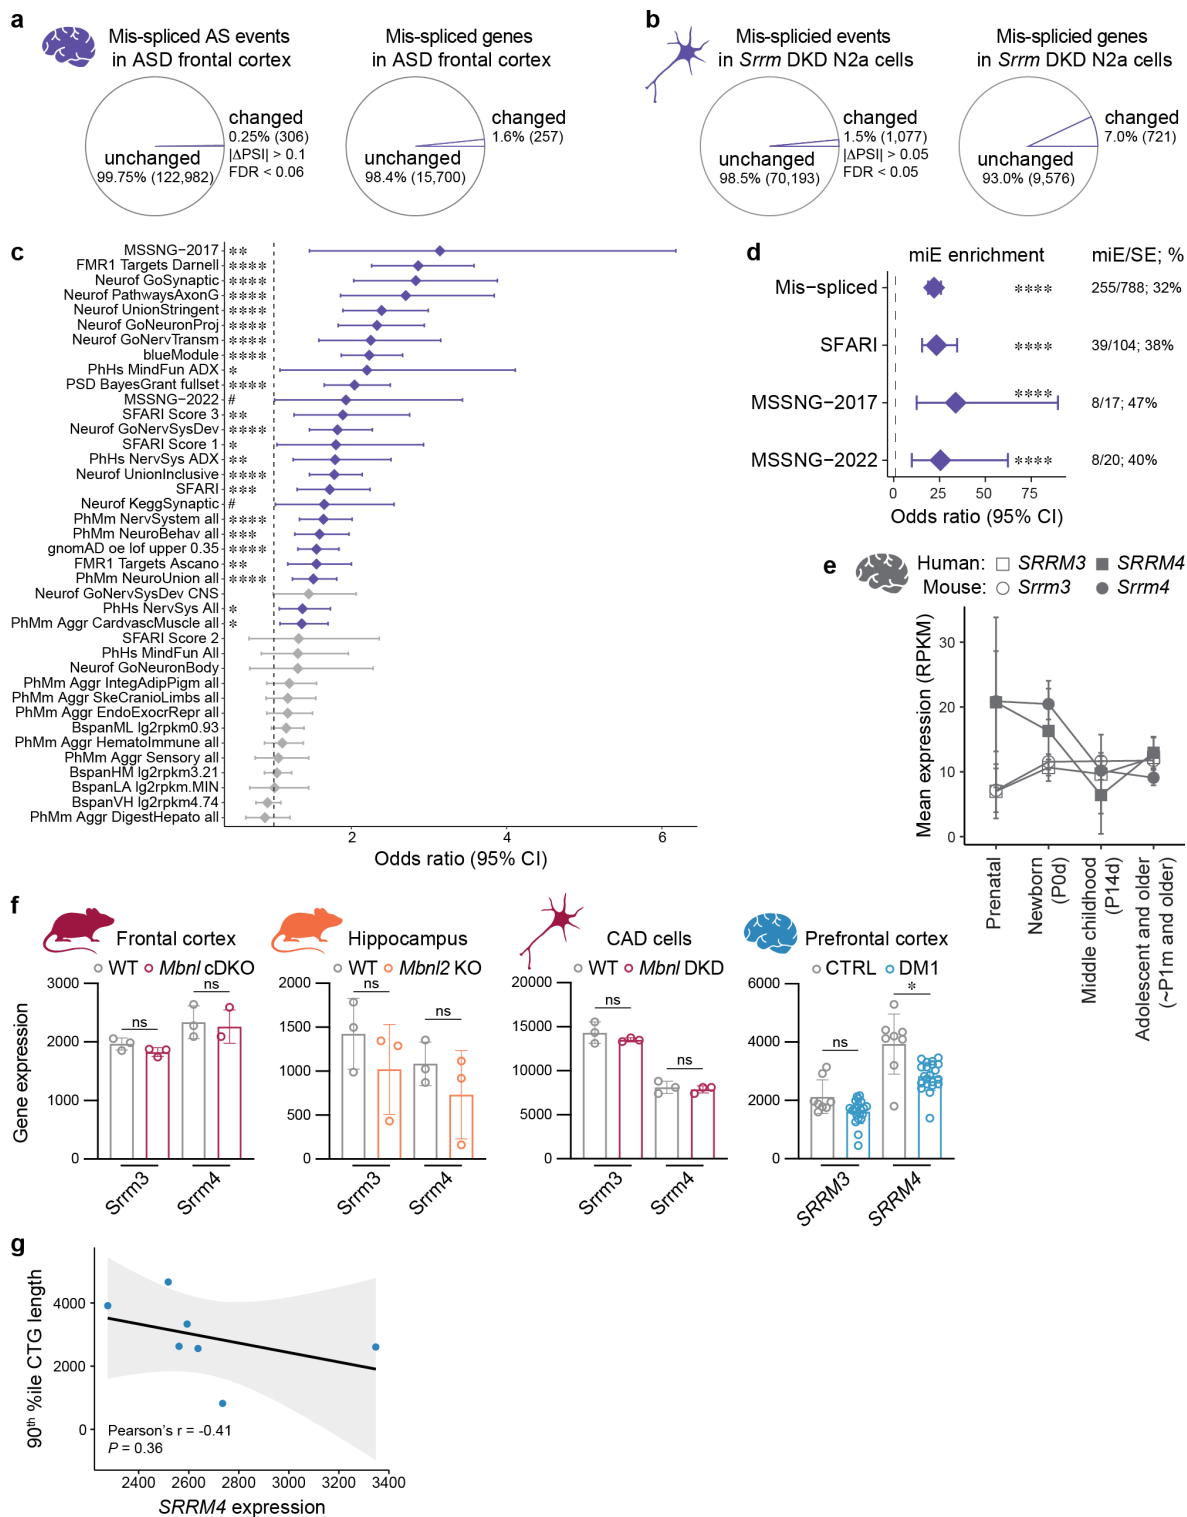

**Supplementary Fig. 6 | Mis-splicing in the *Srrm3;4* double knockdown Neuro2a cells.**

**a**, Differential AS analysis in ASD (N = 10: N<sub>XX</sub> = 1, N<sub>XY</sub> = 9; sampling age: median = 51y, min =

38y, max = 67y; ASD confirmed by the Autism Diagnostic Interview-Revised (ADI-R; N = 8) or supported by records) compared to age-matched CTRL (N = 10: N<sub>XX</sub> = 2, N<sub>XY</sub> = 8; sampling age: median = 50y, min = 41y, max = 60y) frontal cortex (BA9) RNA-seq samples. Pie charts represent the percentage of mis-spliced and unchanged AS events (left) and genes (right) in the ASD frontal cortex. **b**, Differential AS analysis in *Srrm* DKD (N = 2) compared to control (N = 2) N2a RNA-seq samples. Pie charts represent the percentage of mis-spliced and AS events (left) and genes (right) in the *Srrm* DKD N2a cells. **c**, ASD-risk gene-set enrichment analysis for mis-spliced genes in *Srrm* DKD N2a cells. **d**, MiE enrichment analysis for SFARI, MSSNG-2017 and MSSNG-2022 mis-spliced SE events. **c,d**, Points represent the OR and error bars represent the 95% CI. The vertical dashed line represents OR = 1. \* FDR < 0.05, \*\* FDR < 0.01, \*\*\* FDR < 0.001, \*\*\*\* FDR < 0.0001. **e**, *SRRM3* and *SRRM4* gene expression levels in developing human and mouse brains. Points show mean expression  $\pm$  SD. **f**, *SRRM3* and *SRRM4* gene expression levels in *Mbnl* DKO frontal cortex, *Mbnl2* KO hippocampus, *Mbnl* DKD CAD cells, and DM1 prefrontal cortex; ns  $P_{adj}$  > 0.05, \*  $P_{adj}$  = 0.01. **g**, The lack of correlation between estimated 90<sup>th</sup> percentile of CTG repeat lengths (N = 7)<sup>38</sup> and *SRRM4* gene expression in DM1 BA10 RNA-seq.

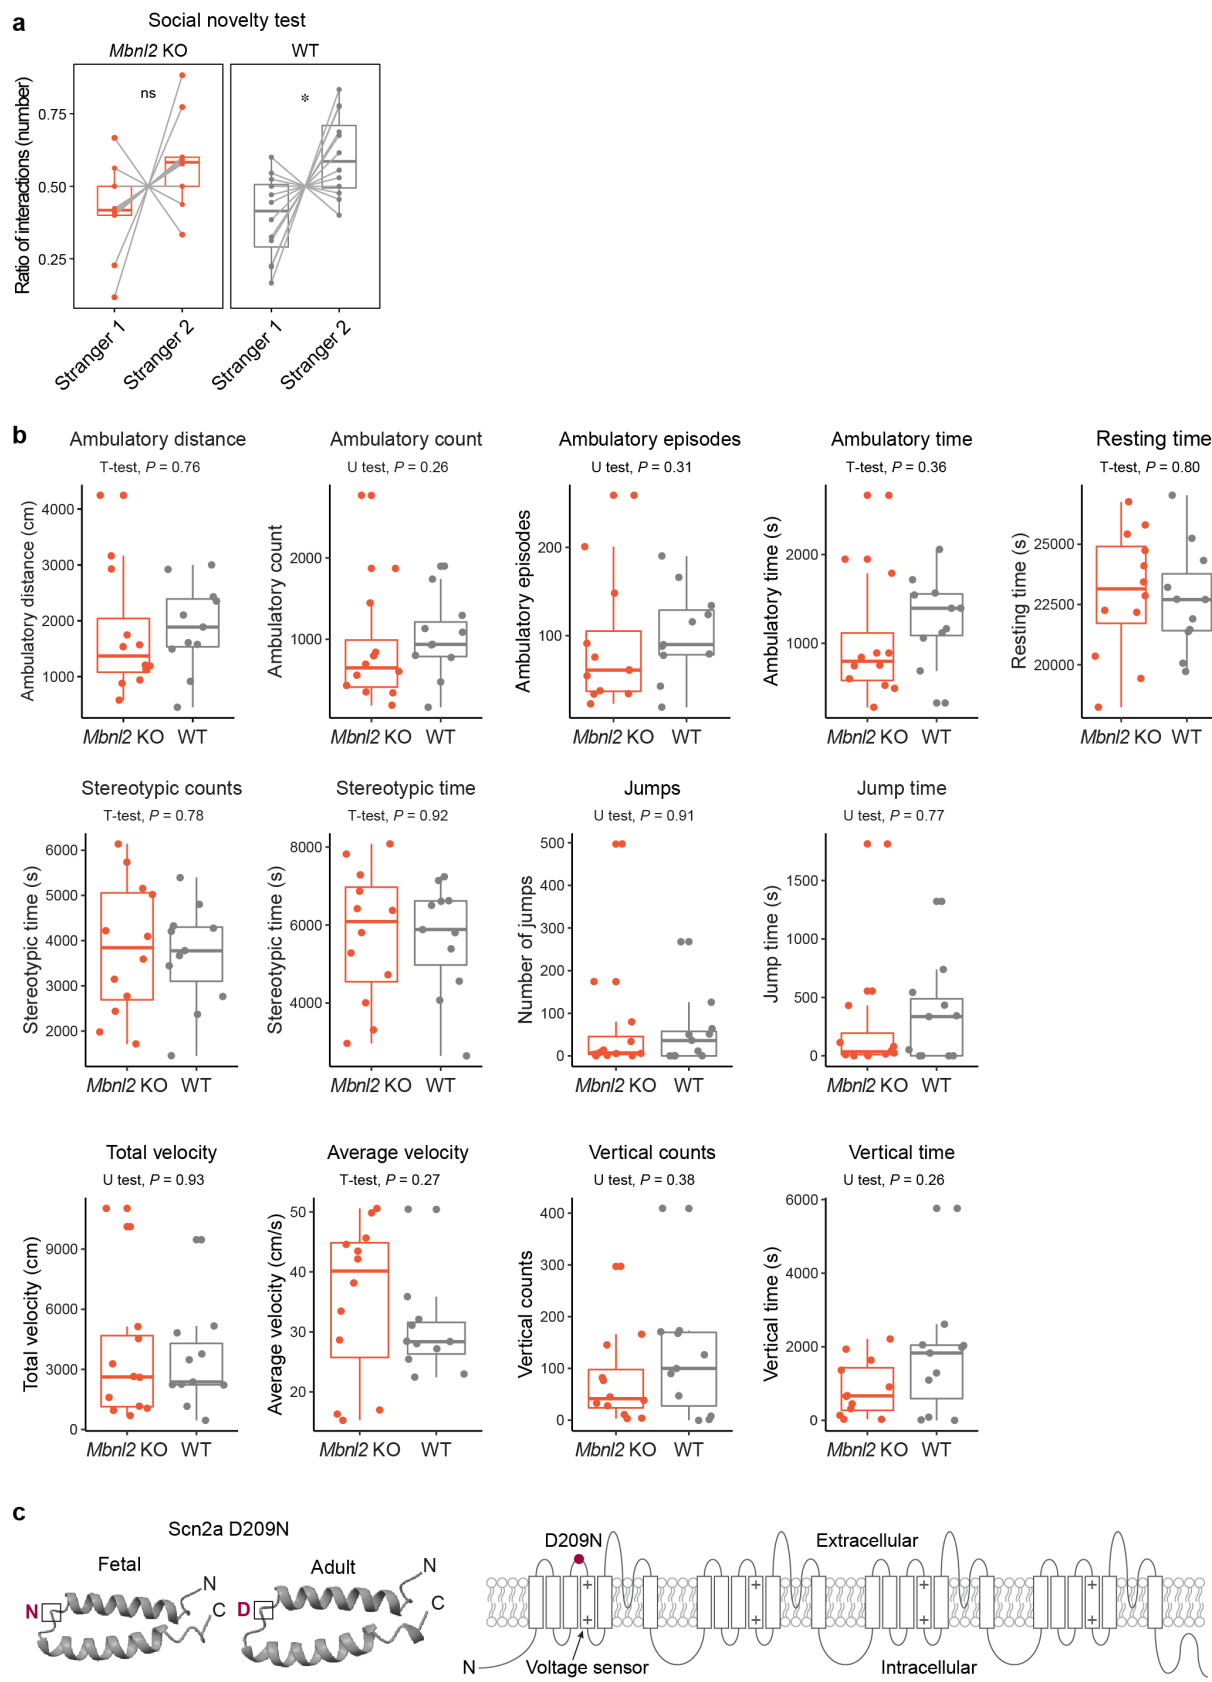

**Supplementary Fig. 7 | Lack of a locomotor deficit in *Mbnl2* knockout mice.** **a**, The ratio of interactions with novel animal (Stranger 2) and familiar animal (Stranger 1) during the social novelty test. The box plot shows the lower (25<sup>th</sup> %ile), middle (median, 50<sup>th</sup> %ile) and upper (75<sup>th</sup> %ile) quartiles. Whiskers show minimum and maximum. Paired dots represent all sample data points, including outliers. WT mice (N = 12: N<sub>XX</sub> = 9, N<sub>XY</sub> = 3), *Mbnl2* KO (N = 12: N<sub>XX</sub> = 9, N<sub>XY</sub> = 3). Statistical differences were determined by the paired t-test: ns  $P = 0.078$  ( $t = 1.941$ ,  $df = 11$ ), \*  $P = 0.025$  ( $t = 2.594$ ,  $df = 11$ ). **b**, Several parameters were measured during the 25 min (5-30 min) interval of the open field test. Box plots show lower (25<sup>th</sup> %ile), middle (median, 50<sup>th</sup> %ile) and upper (75<sup>th</sup> %ile) quartiles. Whiskers show minimum and maximum, and dots represent outliers. WT mice (N = 12: N<sub>XX</sub> = 8, N<sub>XY</sub> = 3), *Mbnl2* KO (N = 12: N<sub>XX</sub> = 9, N<sub>XY</sub> = 3). Statistical differences were determined by the parametric t-test or nonparametric Mann-Whitney U test, and  $P$  values are depicted in the figure. **c**, Modeled structures of SCN2A protein fragments containing a D209N change within the loop sequence, and the Na<sub>v</sub>1.2 transmembrane topology. The location of D209N is marked by the magenta dot.

| Status                                          | Age | Sex    | CTG length<br>(90 %ile) | Source                                  |
|-------------------------------------------------|-----|--------|-------------------------|-----------------------------------------|
| Myotonic dystrophy type 1                       | 48  | Female | 2557.92                 | Otero <i>et al.</i> , 2021 Cell Reports |
| Myotonic dystrophy type 1                       | 41  | Male   | N/A                     |                                         |
| Myotonic dystrophy type 1                       | 56  | Male   | 3330.64                 |                                         |
| Myotonic dystrophy type 1                       | 66  | Female | N/A                     |                                         |
| Myotonic dystrophy type 1                       | 77  | Female | 822.267                 |                                         |
| Myotonic dystrophy type 1                       | 70  | Male   | N/A                     |                                         |
| Myotonic dystrophy type 1                       | 39  | Male   | 4661.35                 |                                         |
| Myotonic dystrophy type 1                       | 59  | Female | N/A                     |                                         |
| Myotonic dystrophy type 1                       | 51  | Female | N/A                     |                                         |
| Myotonic dystrophy type 1                       | 59  | Female | N/A                     |                                         |
| Myotonic dystrophy type 1                       | 65  | Female | 3910.92                 |                                         |
| Myotonic dystrophy type 1                       | 50  | Male   | N/A                     |                                         |
| Myotonic dystrophy type 1                       | 41  | Female | N/A                     |                                         |
| Myotonic dystrophy type 1                       | 65  | Male   | N/A                     |                                         |
| Myotonic dystrophy type 1                       | 60  | Male   | 2605.47                 |                                         |
| Myotonic dystrophy type 1                       | 44  | Female | 2627.01                 |                                         |
| Myotonic dystrophy type 1                       | 50  | Female | N/A                     |                                         |
| Myotonic dystrophy type 1                       | 73  | Female | N/A                     |                                         |
| Myotonic dystrophy type 1                       | 58  | Female | N/A                     |                                         |
| Myotonic dystrophy type 1                       | 41  | Male   | N/A                     |                                         |
| Myotonic dystrophy type 1                       | 47  | Male   | N/A                     |                                         |
| Control                                         | 48  | Male   |                         |                                         |
| Control                                         | 60  | Male   |                         |                                         |
| Control                                         | 52  | Female |                         |                                         |
| Control                                         | 60  | Female |                         |                                         |
| Control                                         | 65  | Male   |                         |                                         |
| Control                                         | 67  | Male   |                         |                                         |
| Control                                         | 65  | Female |                         |                                         |
| Control                                         | 71  | Female |                         |                                         |
| Autism - confirmed by ADI-R                     | 38  | Male   |                         | PsychENCODE                             |
| Autism - confirmed by ADI-R                     | 39  | Male   |                         |                                         |
| Autism - confirmed by ADI-R                     | 52  | Female |                         |                                         |
| Autism - confirmed by ADI-R                     | 60  | Male   |                         |                                         |
| Autism - confirmed by ADI-R                     | 51  | Male   |                         |                                         |
| Autism - confirmed by ADI-R                     | 54  | Male   |                         |                                         |
| Autism - suspected; diagnosis made in childhood | 46  | Male   |                         |                                         |
| Autism - confirmed by ADI-R                     | 46  | Male   |                         |                                         |
| Autism - supported by records                   | 67  | Male   |                         |                                         |

|                             |    |        |
|-----------------------------|----|--------|
| Autism - confirmed by ADI-R | 53 | Male   |
| Control                     | 44 | Male   |
| Control                     | 41 | Male   |
| Control                     | 60 | Male   |
| Control                     | 57 | Male   |
| Control                     | 56 | Male   |
| Control                     | 52 | Female |
| Control                     | 53 | Male   |
| Control                     | 44 | Male   |
| Control                     | 41 | Female |
| Control                     | 50 | Male   |

**Supplementary Table 1 | Human subjects.**

| Gene set ID             | Gene set name                                             | No. of genes | Source                                                                                                                                                                                                                                                                                                                                                                  |
|-------------------------|-----------------------------------------------------------|--------------|-------------------------------------------------------------------------------------------------------------------------------------------------------------------------------------------------------------------------------------------------------------------------------------------------------------------------------------------------------------------------|
| Neurof_PathwaysAxonG    | Axon guidance pathways                                    | 388          | union of these pathway-based gene-sets: {REACT: NCAM signaling for neurite out-growth, REACT: Axon guidance, NCI:NETRIN PATHWAY, NCI:REELINPATHWAY, KEGG:04360 Axon guidance}                                                                                                                                                                                           |
| Neurof_KeggSynaptic     | KEGG synaptic pathways                                    | 407          | union of these KEGG pathway-based gene-sets: {KEGG:04725 Cholinergic synapse, KEGG:04724 Glutamatergic synapse, KEGG:04728 Dopaminergic synapse, KEGG:04727 GABAergic synapse, KEGG:04726 Serotonergic synapse, KEGG:04721 Synaptic vesicle cycle, KEGG:04723 Retrograde endocannabinoid signaling, KEGG:04720 Long-term potentiation, KEGG:04730 Long-term depression} |
| Neurof_GoNeuronBody     | GO neuron body                                            | 309          | GO:0043025 neuronal cell body                                                                                                                                                                                                                                                                                                                                           |
| Neurof_GoSynaptic       | GO synapsis                                               | 622          | union of these GO-based gene-sets: {GO:0045202 synapse, GO:0050808 synapse organization}                                                                                                                                                                                                                                                                                |
| Neurof_GoNeuronProj     | GO neuron projection                                      | 1230         | union of these GO-based gene-sets: {GO:0043005 neuron projection, GO:0031175 neuron projection developmen}                                                                                                                                                                                                                                                              |
| Neurof_GoNervTransm     | GO neurotransmission                                      | 716          | union of these GO-based gene-sets: {GO:0019226 transmission of nerve impulse, GO:0007268 synaptic transmission}                                                                                                                                                                                                                                                         |
| Neurof_GoNervSysDev_CNS | GO central nervous system development                     | 774          | GO:0007417 central nervous system development                                                                                                                                                                                                                                                                                                                           |
| Neurof_GoNervSysDev     | GO nervous system development                             | 1874         | GO:0007399 nervous system development                                                                                                                                                                                                                                                                                                                                   |
| Neurof_UnionInclusive   | Neurofunction union inclusive                             | 2874         | union of these previously defined gene-sets: {Neurof_KeggSynaptic, Neurof_GoNervTransm, Neurof_GoNeuronProj, Neurof_GoNeuronBody, Neurof_GoSynaptic, Neurof_GoNervSysDev, Neurof_PathwaysAxonG}                                                                                                                                                                         |
| Neurof_UnionStringent   | Neurofunction union stringent                             | 1424         | set of genes found in at least two of these previously defined gene-sets {Neurof_KeggSynaptic, Neurof_GoNervTransm, union of {Neurof_GoNeuronProj, Neurof_GoNeuronBody, Neurof_GoSynaptic}, Neurof_GoNervSysDev, Neurof_PathwaysAxonG}                                                                                                                                  |
| FMR1_Targets_Darnell    | FMR1 targets Darnell et al                                | 840          | Human homologs of mouse Fmr1 (fragile X mental retardation 1) gene targets as defined in: FMRP stalls ribosomal translocation on mRNAs linked to synaptic function and autism - Darnell et al - Cell. Jul 22, 2011; 146(2): 247–261.                                                                                                                                    |
| FMR1_Targets_Ascano     | FMR1 targets Ascano et al                                 | 927          | Predicted human FMR1 (fragile X mental retardation 1) gene targets as defined in: FMR1 targets distinct mRNA sequence elements to regulate protein expression - Manuel Ascano Jr et al - Nature 2012 December 20; 492(7429): 382–386                                                                                                                                    |
| PSD_BayesGrant_fullset  | Post-synaptic density components (Bayes et al, full list) | 1407         | Members of the human post-synaptic density as defined in: Characterization of the proteome, diseases and evolution of the human postsynaptic density. Bayés et al. Nat Neurosci. 2011                                                                                                                                                                                   |
| PhHs_NervSys_All        | HPO: Nervous system, any inheritance                      | 1590         | HP:0000707 Abnormality of the nervous system                                                                                                                                                                                                                                                                                                                            |
| PhHs_NervSys_ADX        | HPO: Nervous system, AD or X-linked                       | 651          | HP:0000707 Abnormality of the nervous system, X-linked or autosomal dominant subset                                                                                                                                                                                                                                                                                     |
| PhHs_MindFun_All        | HPO: Higher mental function abnormality, any inheritance  | 439          | HP:0011446 Abnormality of higher mental function                                                                                                                                                                                                                                                                                                                        |
| PhHs_MindFun_ADX        | HPO: Higher mental function abnormality, AD or X-linked   | 153          | HP:0011446 Abnormality of higher mental function, X-linked or autosomal dominant subset                                                                                                                                                                                                                                                                                 |
| PhMm_NeuroBehav_all     | MPO: Neurological abnormality or abnormal behavior        | 2123         | MP:0005386 behavior/neurological phenotype                                                                                                                                                                                                                                                                                                                              |
| PhMm_NervSystem_all     | MPO: Nervous system abnormality                           | 2375         | MP:0003631 nervous system phenotype                                                                                                                                                                                                                                                                                                                                     |



|                              |                                                                                  |      |                                                                                                                                                          |
|------------------------------|----------------------------------------------------------------------------------|------|----------------------------------------------------------------------------------------------------------------------------------------------------------|
| PhMm_NeuroUnion_all          | MPO: Neurological abnormality or abnormal behavior or nervous system abnormality | 3202 | union of these MPO-based gene-sets: {MP:0005386 behavior/neurological phenotype, MP:0003631 nervous system phenotype}                                    |
| PhMm_Aggr_IntegAdipPigm_all  | MPO: Adipose or integument or pigmentation abnormality                           | 1624 | union of these MPO-based gene-sets: {MP:0005375 adipose tissue phenotype, MP:0010771 integument phenotype, MP:0001186 pigmentation phenotype}            |
| PhMm_Aggr_EndoExocrRepr_all  | MPO: Endo- or exocrine or reproductive system abnormality                        | 2026 | union of these MPO-based gene-sets: {MP:0005379 endocrine/exocrine gland phenotype, MP:0005389 reproductive system phenotype}                            |
| PhMm_Aggr_HematImmune_all    | MPO: Hematological or immune abnormality                                         | 2605 | union of these MPO-based gene-sets: {MP:0005397 hematopoietic system phenotype, MP:0005387 immune system phenotype}                                      |
| PhMm_Aggr_DigestHepato_all   | MPO: Digestive or hepatobiliary abnormality                                      | 1493 | union of these MPO-based gene-sets: {MP:0005381 digestive/alimentary phenotype, MP:0005370 liver/biliary system phenotype}                               |
| PhMm_Aggr_CardvascMuscle_all | MPO: Cardiovascular or muscle abnormality                                        | 2059 | union of these MPO-based gene-sets: {MP:0005385 cardiovascular system phenotype, MP:0005369 muscle phenotype}                                            |
| PhMm_Aggr_Sensory_all        | MPO: Sensory system abnormality                                                  | 1293 | union of these MPO-based gene-sets: {MP:0005377 hearing/vestibular/ear phenotype, MP:0005394 taste/olfaction phenotype, MP:0005391 vision/eye phenotype} |
| PhMm_Aggr_SkeCranioLimbs_all | MPO: Skeletal or limb or cranium abnormality                                     | 1588 | union of these MPO-based gene-sets: {MP:0005382 craniofacial phenotype, MP:0005371 limbs/digits/tail phenotype, MP:0005390 skeleton phenotype}           |
| BSPan_VH_thr4.74             | Brain very high expr                                                             | 4600 | > 3rd quartile of BrainSpan expression                                                                                                                   |
| BSPan_HM_thr3.21             | Brain high/medium expr                                                           | 4605 | 2nd-3rd quartile of BrainSpan expression                                                                                                                 |
| BSPan_ML_thr0.93             | Brain medium/low expr                                                            | 4596 | 1st-2nd quartile of BrainSpan expression                                                                                                                 |
| BSPan_Ab_thr.MIN             | Brain low/absent expr                                                            | 4601 | < 1st quartile of BrainSpan expression                                                                                                                   |
| gnomAD_oe_lof_upper_0.35     | gnomAD LoF intolerance                                                           | 2925 | gene with upper bound of CI of oe < 0.35 defined by gnomAD                                                                                               |
| MSSNG-2017                   | MSSNG 2017                                                                       | 81   | List of genes in MSSNG (2017) database                                                                                                                   |
| MSSNG-2022                   | MSSNG 2022                                                                       | 134  | List of genes in MSSNG (2022) database                                                                                                                   |
| SFARI                        | SFARI                                                                            | 1023 | List of genes in SFARI database (as of 01-27-2022)                                                                                                       |
| SFARI_Score_1                | SFARI Score 1                                                                    | 207  | List of genes in SFARI database (as of 01-27-2022) with a score of 1                                                                                     |
| SFARI_Score_2                | SFARI Score 2                                                                    | 220  | List of genes in SFARI database (as of 01-27-2022) with a score of 2                                                                                     |
| SFARI_Score_3                | SFARI Score 3                                                                    | 515  | List of genes in SFARI database (as of 01-27-2022) with a score of 3                                                                                     |

**Supplementary Table 2 | ASD-relevant gene sets.**
